# Supplementary material
Source: MDPI journal article supplement (https://www.mdpi.com/2073-445X/12/6/1126)

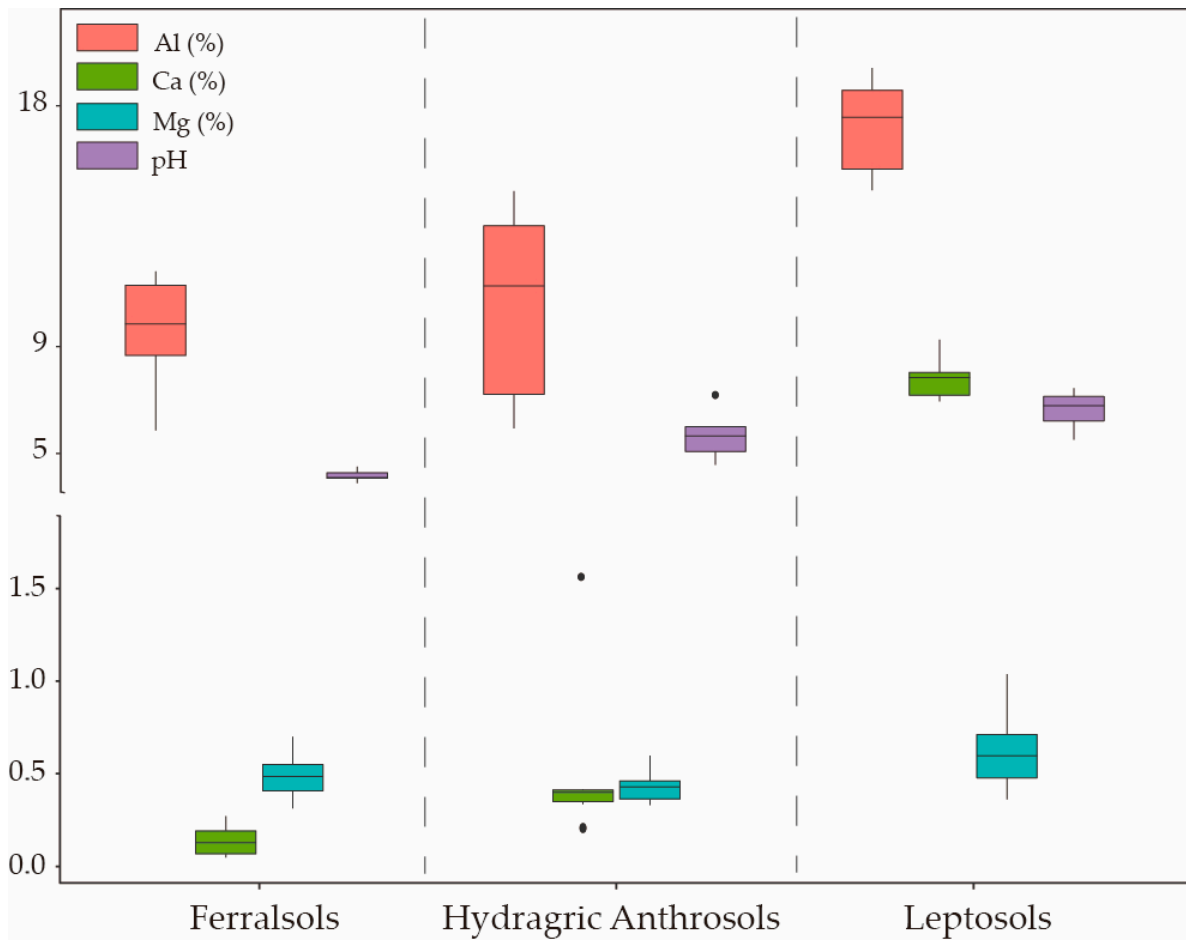

Figure S1: Physicochemical properties under different soil types.

Supplement: s1 [file s1]
